# Supplementary material
Source: Springer Nature journal article supplement (https://www.springermedizin.de/resource/supplementary/12888_2013_1470_MOESM1_ESM.pdf/9480446)
Supplement: MOESM1 [file 9480446]

## Research design

### Stage of intervention

Training

Process (3 days)

N=17

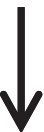

Treatment

Group 1

9 participants

3 facilitators

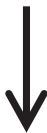

Treatment

Group 2

10 participants

3 facilitators

### Research methods

Direct non-participant observation

Self-rated semi-structured survey

Focus group discussion

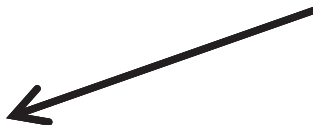

Self-rated semi-structured sessional feedback

Self-rated semi-structured survey

Focus group at session 14 (n=6)

Individual facilitator qualitative interviews (n=3)

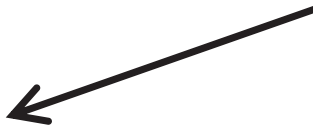

Self-rated semistructured sessional feedback

Self-rated semi-structured survey

Focus group at session 14 (n=7)

Individual facilitator qualitative interviews (n=3)
